# Supplementary material for: Tensile Properties of Three Selected Collagen Membranes
Source: Biomed Res Int. 2019 Dec 5;2019:5163603. doi: 10.1155/2019/5163603 (PMC6915138; doi:10.1155/2019/5163603)
Supplement: Supplementary Materials — The data include the physical measurements (e.g., weight, length, and density) of each sample of the examined membrane and the mechanical measurements of the tensile test. The averages were included too. B, Biogide; O, Ossix-plus; R, Remaix, wet/dry (no tags). [file 5163603.f1.xlsx]

## Sheet: Data
The raw data used to support the findings of this study are included within the supplementary information file(s).
	Weight (g)	Length (mm)	Width (mm)	Area (mm2)	Thickness 1	Thickness 2	Thickness 3	Thickness Avg	Volume (mm3)	Density (mg/mm3)	Max Load (N)	Max Extension (mm)	Energy (AUC)	Max Stress (N/mm2)	Max Strain	Group Max Load	Group Max Ext
B1	0.0088	15	5	75	0.294	0.311	0.338	0.314333	23.575	0.373277	8.427	3.3607	15.3746	0.11236	0.33607	16.15	4.2486
B2	0.0107	15.5	5	77.5	0.346	0.37	0.411	0.375667	29.1142	0.367519	10.698	2.745	16.5196	0.138039	0.261429
B3	0.0066	14.8	5	74	0.309	0.344	0.319	0.324	23.976	0.275275	6.367	3.2668	9.74698	0.0860405	0.333347
B4	0.0111	15	5	75	0.409	0.471	0.588	0.489333	36.7	0.302452	9.851	4.2486	20.4773	0.131347	0.42486
B5	0.0115	15	5	75	0.473	0.448	0.459	0.46	34.5	0.333333	10.806	4.0559	23.7085	0.14408	0.40559
B6	0.0097	15	5	75	0.394	0.371	0.325	0.363333	27.25	0.355963	11.304	3.8274	23.3885	0.15072	0.38274
B7	0.0064	14.5	5	72.5	0.303	0.308	0.296	0.302333	21.9192	0.291982	4.903	2.9408	5.11735	0.0676276	0.309558
B8	0.0186	15	5	75	0.604	0.676	0.662	0.647333	48.55	0.38311	16.15	4.1361	35.8083	0.215333	0.41361
B9	0.009	15	5.3	79.5	0.302	0.355	0.359	0.338667	26.924	0.334274	6.971	2.9214	10.6646	0.0876855	0.29214
B10	0.0099	15.5	5	77.5	0.437	0.43	0.393	0.42	32.55	0.304147	8.642	4.1371	19.3333	0.11151	0.39401
Average	0.01023	15.03	5.03	75.6	0.3871	0.4084	0.415	0.4035	30.5058	0.332133	9.4119	3.56398	18.0139	0.124496	0.355332
St. Dev.	0.00340655	0.294581	0.0948683	2.01108	0.0990022	0.109037	0.121982	0.106136	7.98516	0.037456	3.16043	0.580947	8.7155	1.57151	-0.123463
CV	0.332996	0.0195995	0.0188605	0.0266016	0.255754	0.266987	0.293932	0.263038	0.261758	0.112774	0.335791	0.163005	0.48382	12.623	-0.0327293
B1 Wet	0.0082	15	4.8	72	0.385	0.427	0.415	0.409	29.448	0.278457	2.207	5.0246	3.65221	0.0306528	0.50246	6.135	7.8128
B2 Wet	0.0118	15	5	75	0.511	0.46	0.437	0.469333	35.2	0.335227	2.882	4.7871	4.98422	0.0384267	0.47871
B3 Wet	0.0083	15	5	75	0.359	0.325	0.31	0.331333	24.85	0.334004	3.729	5.751	6.30429	0.04972	0.5751
B4 Wet	0.0158	15	5	75	0.829	0.815	0.502	0.715333	53.65	0.294501	6.135	4.3037	8.048	0.0818	0.43037
B5 Wet	0.0099	15	5	75	0.433	0.441	0.456	0.443333	33.25	0.297744	1.91	5.5862	2.58707	0.0254667	0.55862
B6 Wet	0.0105	15	5.3	79.5	0.383	0.428	0.471	0.427333	33.973	0.309069	4.033	7.3658	9.5478	0.0507296	0.73658
B7 Wet	0.0102	15	5	75	0.423	0.426	0.339	0.396	29.7	0.343434	4.315	5.1488	5.24919	0.0575333	0.51488
B8 Wet	0.0061	15	5	75	0.319	0.299	0.308	0.308667	23.15	0.263499	1.985	3.846	2.01844	0.0264667	0.3846
B9 Wet	0.0085	15	5.1	76.5	0.429	0.395	0.372	0.398667	30.498	0.278707	5.147	7.8128	13.528	0.067281	0.78128
B10 Wet	0.0134	15	5	75	0.571	0.488	0.463	0.507333	38.05	0.352168	4.704	5.214	6.53913	0.06272	0.5214
Average	0.01027	15	5.02	75.3	0.4642	0.4504	0.4073	0.440633	33.1769	0.308681	3.7047	5.484	6.24583	0.0491992	0.5484
St. Dev.	0.00282058	0	0.122927	1.84391	0.147423	0.140589	0.0704589	0.113055	8.50276	0.0309463	1.43621	1.24741	3.46152	0.778894	-0.249483
CV	0.274643	0	0.0244875	0.0244875	0.317585	0.312143	0.17299	0.256573	0.256286	0.100253	0.387672	0.227464	0.554213	15.8314	-0.0454928
R1	0.0104	14.8	5	74	0.273	0.298	0.338	0.303	22.422	0.46383	16.975	10.3171	95.7636	0.229392	1.05277	22.083	10.3171
R2	0.0105	15	5	75	0.305	0.335	0.337	0.325667	24.425	0.429887	21.198	7.0397	80.1002	0.28264	0.70397
R3	0.007	15	5	75	0.245	0.232	0.228	0.235	17.625	0.397163	8.489	5.2714	28.9057	0.113187	0.52714
R4	0.0082	15	5	75	0.264	0.278	0.278	0.273333	20.5	0.4	11.146	6.53	48.0186	0.148613	0.653
R5	0.0101	15.1	5	75.5	0.321	0.312	0.3	0.311	23.4805	0.430144	19.381	6.9896	75.138	0.256702	0.69204
R6	0.009	15	5	75	0.292	0.295	0.29	0.292333	21.925	0.41049	9.862	8.0846	46.5466	0.131493	0.80846
R7	0.0105	15.1	5	75.5	0.301	0.313	0.317	0.310333	23.4302	0.44814	22.083	7.0679	91.8691	0.29249	0.699792
R8	0.0083	15	5	75	0.275	0.281	0.288	0.281333	21.1	0.393365	11.263	6.5619	47.2794	0.150173	0.65619
R9	0.0111	15	5	75	0.328	0.317	0.372	0.339	25.425	0.436578	18.562	6.4066	67.5747	0.247493	0.64066
R10	0.0105	15	5	75	0.283	0.293	0.309	0.295	22.125	0.474576	17.757	5.8422	60.3447	0.23676	0.58422
Average	0.00956	15	5	75	0.2887	0.2954	0.3057	0.2966	22.2458	0.428417	15.6716	7.0111	64.1541	0.208955	0.70111
St. Dev.	0.00134677	0.0816497	0	0.408248	0.0258244	0.0282103	0.0393758	0.0291915	2.20213	0.0282447	5.00074	1.38556	21.7716	12.2493	-0.281713
CV	0.140875	0.00544331	0	0.00544331	0.0894507	0.0954987	0.128805	0.0984204	0.098991	0.065928	0.319096	0.197624	0.339364	58.6217	-0.0395679
R1 Wet	0.0098	15	5	75	0.305	0.303	0.297	0.301667	22.625	0.433149	8.666	12.5171	31.9178	0.115547	1.25171	13.821	14.125
R2 Wet	0.0103	15.1	5	75.5	0.328	0.324	0.305	0.319	24.0845	0.427661	8.71	11.951	41.7811	0.115364	1.18327
R3 Wet	0.0104	15	5.1	76.5	0.334	0.315	0.287	0.312	23.868	0.43573	7.463	13.1993	34.4648	0.0975556	1.31993
R4 Wet	0.0072	15.1	5	75.5	0.27	0.268	0.272	0.27	20.385	0.353201	6.881	13.9778	33.8468	0.0911391	1.38394
R5 Wet	0.0078	15	5	75	0.298	0.303	0.288	0.296333	22.225	0.350956	8.266	12.9171	3.7e-06	0.110213	1.29171
R6 Wet	0.0071	15	5	75	0.257	0.26	0.263	0.26	19.5	0.364103	6.351	13.4294	25.8385	0.08468	1.34294
R7 Wet	0.0064	15	5	75	0.222	0.22	0.205	0.215667	16.175	0.395672	3.421	9.9155	10.1565	0.0456133	0.99155
R8 Wet	0.0108	15	5	75	0.313	0.328	0.341	0.327333	24.55	0.439919	13.821	13.7249	63.8192	0.18428	1.37249
R9 Wet	0.0097	15	5	75	0.28	0.314	0.33	0.308	23.1	0.419913	6.506	12.5448	30.7378	0.0867467	1.25448
R10 Wet	0.008	15.1	5	75.5	0.244	0.254	0.254	0.250667	18.9253	0.422714	6.501	14.125	28.5513	0.086106	1.39851
Average	0.00875	15.03	5.01	75.3	0.2851	0.2889	0.2842	0.286067	21.5438	0.404302	7.6586	12.8302	30.1114	0.101708	1.27918
St. Dev.	0.001614	0.0483046	0.0316228	0.483046	0.0369488	0.0360661	0.0390521	0.0356477	2.71108	0.0355345	2.65504	1.2358	17.1093	5.49645	-0.249571
CV	0.184457	0.00321388	0.00631193	0.00641495	0.129599	0.12484	0.137411	0.124613	0.12584	0.0878911	0.346674	0.0963195	0.5682	54.0415	-0.0192763
O1	0.0041	14.8	5	74	0.281	0.283	0.283	0.282333	20.8927	0.196241						10.265	0.0778
O2	0.0042	15	5	75	0.276	0.285	0.285	0.282	21.15	0.198582	10.265	0.0644	5.45878	0.136867	0.00644
O3	0.004	14.8	5	74	0.283	0.284	0.278	0.281667	20.8433	0.191908	2.368	0.0638	0.767756	0.032	0.0065102
O4	0.004	14.8	5	74	0.281	0.282	0.271	0.278	20.572	0.194439	8.323	0.0594	4.21982	0.112473	0.00606122
O5	0.0042	14.4	5	72	0.245	0.251	0.246	0.247333	17.808	0.235849	7.605	0.0661	2.22822	0.105625	0.00703191
O6	0.0042	15	5	75	0.246	0.237	0.224	0.235667	17.675	0.237624	7.793	0.0778	2.80014	0.103907	0.00778
O7	0.0043	14.8	5	74	0.2	0.186	0.193	0.193	14.282	0.301078	7.042	0.0737	1.7261	0.0951622	0.00752041
O8	0.004	14.8	5	74	0.212	0.222	0.245	0.226333	16.7487	0.238825	5.092	0.0695	1.03693	0.0688108	0.00709184
O9	0.0042	14.8	4.6	68.08	0.286	0.286	0.281	0.284333	19.3574	0.216971	6.38	0.0751	2.21655	0.0937133	0.00766327
O10	0.0043	15.1	4.8	72.48	0.266	0.264	0.261	0.263667	19.1106	0.225006	8.81	0.0549	3.40167	0.121551	0.00543564
Average	0.00415	14.83	4.94	73.256	0.2576	0.258	0.2567	0.257433	18.844	0.223652	7.07533	0.0671889	2.65066	0.0965837	0.00683509
St. Dev.	0.000117851	0.188856	0.13499	2.04997	0.0309953	0.0339869	0.0300705	0.031075	2.22298	0.0330932	2.29435	0.00754196	1.51267	1.11921	-0.0015676
CV	0.0283979	0.0127347	0.0273259	0.0279837	0.120324	0.131732	0.117142	0.120711	0.117968	0.147967	0.324275	0.11225	0.570676	11.588	-0.0225073
O1 Wet	0.0041	14.8	4.6	68.08	0.201	0.227	0.235	0.221	15.0457	0.272503	1.146	1.4894	0.758887	0.0168331	0.15198	1.922	1.8216
O2 Wet	0.0037	15	5	75	0.276	0.282	0.262	0.273333	20.5	0.180488	1.801	1.149	0.729881	0.0240133	0.1149
O3 Wet	0.005	15	5	75	0.277	0.274	0.272	0.274333	20.575	0.243013	1.713	1.2597	0.771267	0.02284	0.12597
O4 Wet	0.0052	15	5	75	0.273	0.283	0.277	0.277667	20.825	0.2497	1.426	1.2266	0.678816	0.0190133	0.12266
O5 Wet	0.0044	13.5	5	67.5	0.255	0.262	0.261	0.259333	17.505	0.251357	1.756	1.0778	0.580802	0.0260148	0.1268
O6 Wet	0.0055	14.6	5	73	0.282	0.303	0.304	0.296333	21.6323	0.254249	1.922	1.2324	0.86783	0.0263288	0.128375
O7 Wet	0.0044	14.8	5	74	0.275	0.289	0.291	0.285	21.09	0.20863	1.469	1.0136	0.502419	0.0198514	0.103429
O8 Wet	0.0048	14.6	5	73	0.264	0.272	0.269	0.268333	19.5883	0.245044	1.896	1.8216	0.880186	0.0259726	0.18975
O9 Wet	0.0053	14.6	5	73	0.289	0.296	0.293	0.292667	21.3647	0.248073	1.562	1.3893	0.646358	0.0213973	0.144719
O10 Wet	0.0044	14.6	5	73	0.281	0.293	0.292	0.288667	21.0727	0.208801	1.588	1.689	0.705811	0.0217534	0.175938
Average	0.00468	14.65	4.96	72.658	0.2673	0.2781	0.2756	0.273667	19.9199	0.236186	1.6279	1.33484	0.712226	0.022405	0.138325
St. Dev.	0.000575036	0.440328	0.126491	2.71389	0.0251531	0.0217176	0.0203317	0.0217369	2.08173	0.0277608	0.239482	0.262652	0.117938	0.0882429	-0.0576033
CV	0.122871	0.0300565	0.0255022	0.0373516	0.0941006	0.0780929	0.0737725	0.0794285	0.104505	0.117538	0.147111	0.196767	0.165591	3.93854	-0.0395914
